# Supplementary material for: Femtosecond laser directed fabrication of optical diffusers
Source: PubMed Central journal article supplement (PMC6112377; doi:10.1039/c7ra00109f), 2017-03-24
Supplement: RA-007-C7RA00109F-s001.pdf [file RA-007-C7RA00109F-s001.pdf]

## SUPPORTING INFORMATION

# Femtosecond Laser Directed Fabrication of Optical Diffusers

*Tawfiq Alqurashi<sup>1,2,t</sup>, Pavel Penchev<sup>1</sup>, Ali K. Yetisen<sup>3</sup>, Aydin Sabouri,<sup>1</sup>Rayan M. Ameen<sup>4</sup>, Stefan Dimov<sup>1</sup>, and Haider Butt<sup>1,\*</sup>*

*<sup>1</sup>School of Engineering, University of Birmingham, Birmingham, B15 2TT, UK*

*<sup>2</sup>Department of Mechanical Engineering, School of Engineering, Shaqra University, Dawadmi, Saudi Arabia*

*<sup>3</sup>Harvard-MIT Division of Health Sciences and Technology, Massachusetts Institute of Technology, Cambridge, Massachusetts 02139, USA*

*<sup>4</sup>School of Metallurgy and Materials, University of Birmingham, Birmingham, B15 2TT, UK*

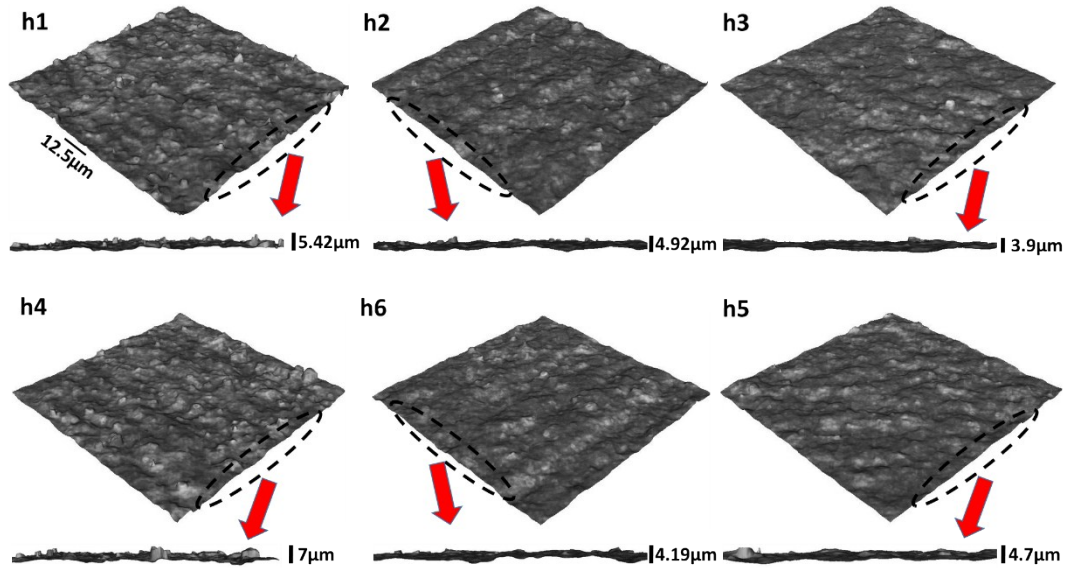

**Fig. S1.** 3D view images of resulting surface topographies were captured by Alicona system.

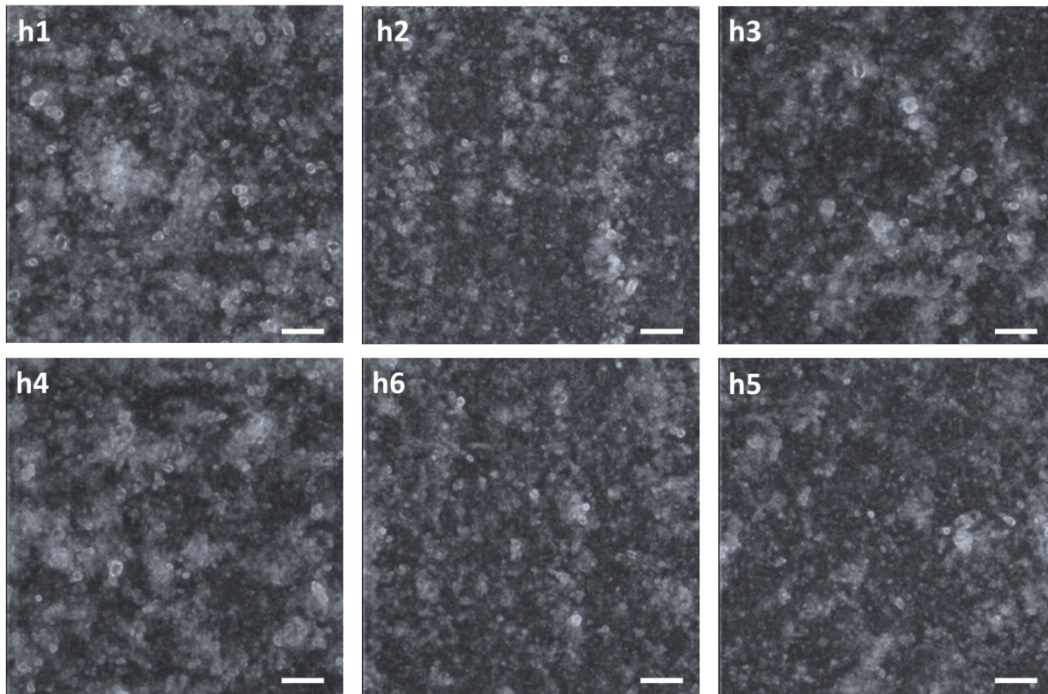

**Fig. S2.** Normal view images of microstructure of ripples from rough surfaces were captured by Alicona system. Scale bar= 10  $\mu$ m.
